# Supplementary material for: 5-Pyrimidyl phosphonic acid as a building block for the synthesis of coordination polymers
Source: Royal Society of Chemistry journal article supplement (doi:10.1039/b809504n), 2008-01-01
Supplement: b809504n.pdf [file b809504n.pdf]

Supplementary Information

Hydrogen Bonding Tables

**Polymer 1**

Hydrogen bonds for **1** [Å and °].

| D-H...A           | d(D-H)    | d(H...A) | d(D...A) | <(DHA) |
|-------------------|-----------|----------|----------|--------|
| O(2)-H(2A)...O(5) | 0.872(10) | 1.73(3)  | 2.556(4) | 158(6) |

**Polymer 4**

Hydrogen bonds for **4** [Å and °].

| D-H...A            | d(D-H) | d(H...A) | d(D...A) | <(DHA) |
|--------------------|--------|----------|----------|--------|
| O(4)-H(4B)...O(12) | 0.89   | 2.00     | 2.854(3) | 160.3  |
| O(4)-H(4A)...O(18) | 0.89   | 2.01     | 2.883(3) | 166.5  |
| O(3)-H(3A)...O(18) | 0.84   | 1.83     | 2.655(3) | 168.1  |

Symmetry transformations used to generate equivalent atoms:

#1 -x+1,-y+1,-z+1 #2 x,y-1,z #3 x,y+1,z #4 -x,-y+1,-z+1
